# Supplementary material
Source: PubMed Central journal article supplement (PMC3578065)
Supplement: NIHMS433011-supplement-1_si_001.pdf [file NIHMS433011-supplement-1_si_001.pdf]

# Nanoparticle PET/CT Imaging of Natriuretic Peptide Clearance Receptor in Prostate Cancer

Eric D. Pressly<sup>†</sup>, Richard A. Pierce<sup>‡</sup>, Luke A. Connal<sup>†</sup>, Craig J. Hawker<sup>†,‡</sup>, Yongjian Liu<sup>§\*</sup>

<sup>†</sup>Materials Research Laboratory, University of California, Santa Barbara, California 93106, United States

<sup>#</sup> Materials Department and Department of Chemistry, and Biochemistry, University of California, Santa Barbara, California 93106, United States

<sup>‡</sup>Department of Medicine, Washington University, St. Louis, Missouri 63110, United States

<sup>§</sup>Department of Radiology, Washington University, St. Louis, Missouri 63110, United States

Corresponding author: Yongjian Liu, Ph.D., Department of Radiology, Washington University,

Campus Box 8225, 510 S. Kingshighway Blvd., St. Louis, MO 63110.

Email: liuyo@mir.wustl.edu

Phone: 314-362-8431

Fax: 314-362-9940

## SUPPLEMENTAL INFORMATION

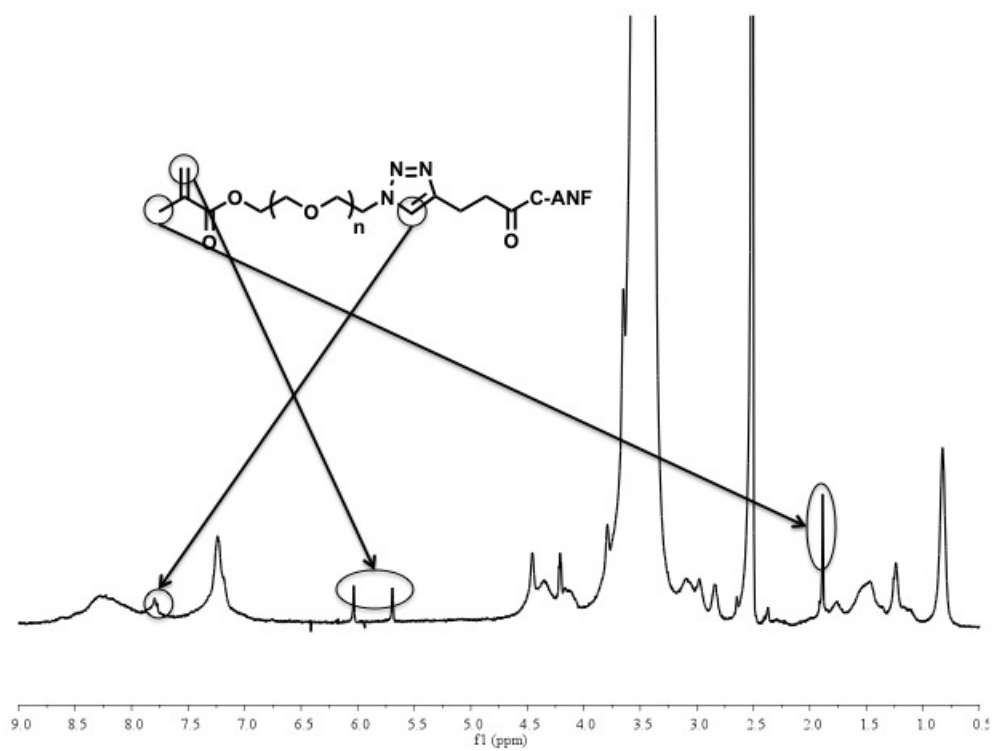

**Figure S1.** NMR of CANF-PEG-Methacryate monomer.

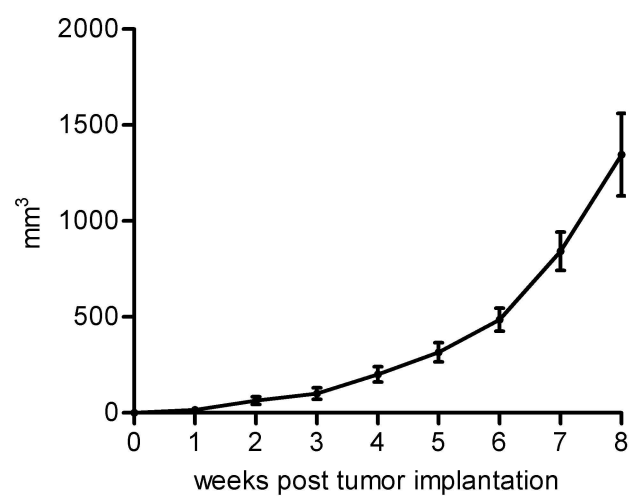

**Figure S2.** CWR22 tumor growth curve

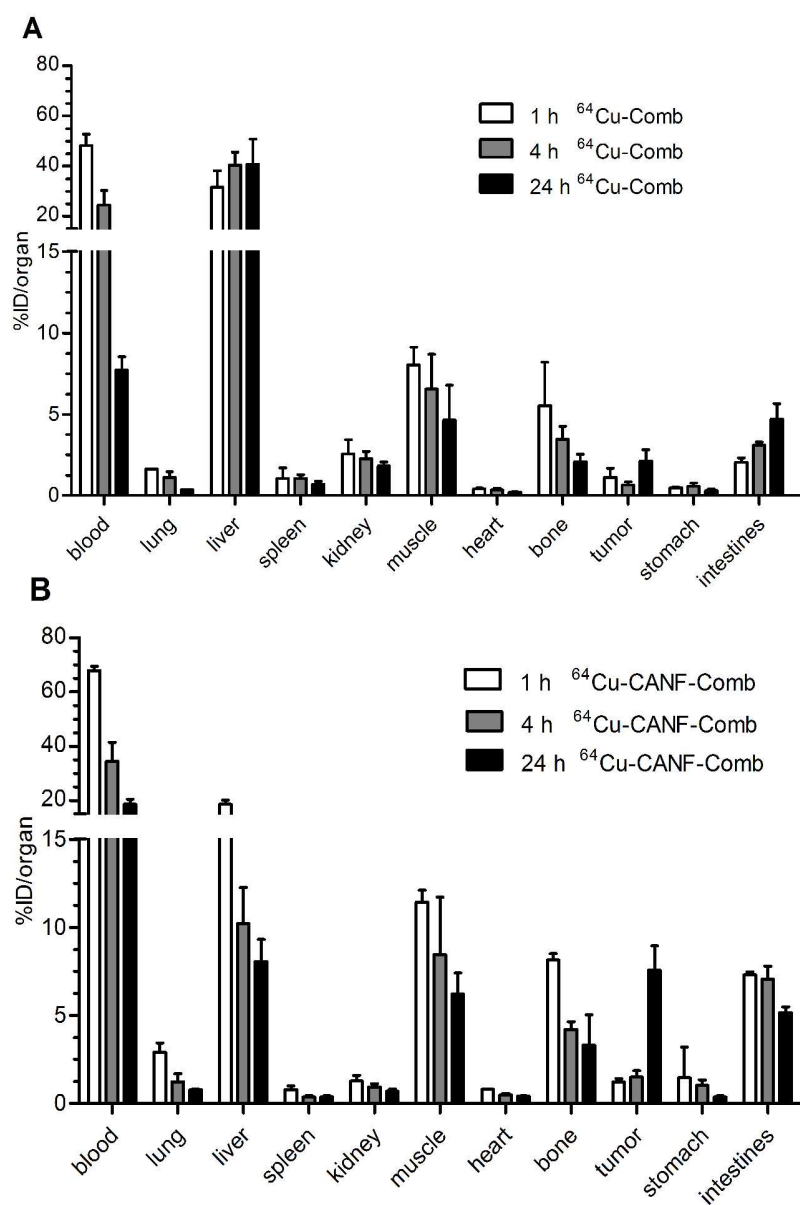

**Figure S3.** Biodistribution of  $^{64}\text{Cu}$ -Comb and  $^{64}\text{Cu}$ -CANF-Comb in CWR22 tumor model following intravenous injection (n=4/group) presented in %ID/organ. (A)  $^{64}\text{Cu}$ -Comb showing low tumor accumulation but high liver uptake. (B)  $^{64}\text{Cu}$ -CANF-Comb showing high tumor localization and superior pharmacokinetics relative to  $^{64}\text{Cu}$ -Comb with high blood retention and low hepatic burden.

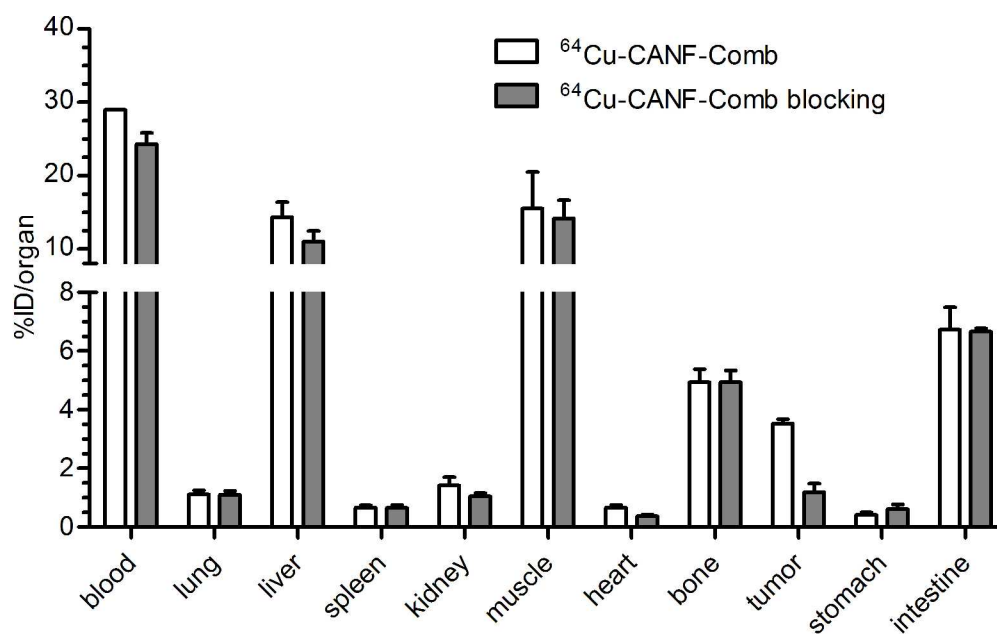

**Figure S4.** Biodistribution of  $^{64}\text{Cu}$ -CANF-Comb and  $^{64}\text{Cu}$ -CANF-Comb blocking in CWR 22 tumor model at 24 h post injection (n=4/group, blockade :  $^{64}\text{Cu}$ -CANF-Comb = 100:1) presented in %ID/organ.

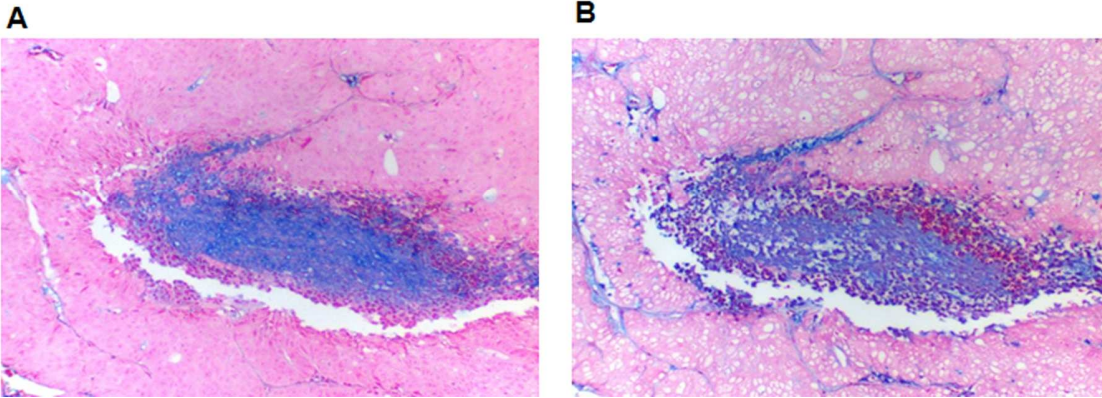

**Figure S5.** Immunohistochemical staining of CWR 22 tumor tissue showing the co-localization of NPRC receptor to endothelial cells. (A) Pocket of NPRC receptors (blue). (B) CD 31 positive endothelial cells (blue). Both panels are at 200x.

**Table S1.** Characterization data for nanoparticles

| Nanoparticle                   | CANF-Comb | Control Comb |
|--------------------------------|-----------|--------------|
| Size (DLS)                     | 16 nm     | 22 nm        |
| Zeta Potential                 | -1.1      | -35          |
| # of DOTAs (avg)               | 105       | 105          |
| # of CANFs (avg)               | 35        | 0            |
| M <sub>n</sub> parent polymer* | 205 kDa   | 220 kDa      |
| PDI parent polymer*            | 1.20      | 1.25         |

\* PMMA standards
